1 **A Chromosome-level Sequence Assembly Reveals the Structure of the *Arabidopsis***  
2 ***thaliana* Nd-1 Genome and its Gene Set**

3

4 **Boas Pucker<sup>1</sup>, Daniela Holtgräwe<sup>1</sup>, Kai Bernd Stadermann<sup>1</sup>, Katharina Frey<sup>1</sup>, Bruno**  
5 **Huettel<sup>2</sup>, Richard Reinhardt<sup>2</sup> and Bernd Weisshaar<sup>1\*</sup>**

6

7 <sup>1</sup> Bielefeld University, Faculty of Biology & Center for Biotechnology, Bielefeld, Germany

8 <sup>2</sup> Max Planck Genome Centre Cologne, Max Planck Institute for Plant Breeding Research,  
9 Cologne, Germany

10 \* Corresponding author (BW)

11

12 Email addresses:

13 BP: [bpucker@cebitec.uni-bielefeld.de](mailto:bpucker@cebitec.uni-bielefeld.de)  
14 DH: [dholtgra@cebitec.uni-bielefeld.de](mailto:dholtgra@cebitec.uni-bielefeld.de)  
15 KS: [kstaderm@cebitec.uni-bielefeld.de](mailto:kstaderm@cebitec.uni-bielefeld.de)  
16 KF: [katharina.frey@uni-bielefeld.de](mailto:katharina.frey@uni-bielefeld.de).  
17 BH: [huettel@mpipz.mpg.de](mailto:huettel@mpipz.mpg.de)  
18 RR: [reinhardt@mpipz.mpg.de](mailto:reinhardt@mpipz.mpg.de)  
19 BW: [bernd.weisshaar@uni-bielefeld.de](mailto:bernd.weisshaar@uni-bielefeld.de)

20

21 ORCIDs

22 BP: <https://orcid.org/0000-0002-3321-7471>  
23 DH: <https://orcid.org/0000-0002-1062-4576>  
24 KS: <https://orcid.org/0000-0002-8036-1492>  
25 BW: <https://orcid.org/0000-0002-7635-3473>

26

27

28 **Abstract**

29 **Background**

30 In addition to the BAC-based reference sequence of the accession Columbia-0 from the year  
31 2000, several short read assemblies of THE plant model organism *Arabidopsis thaliana* were  
32 published during the last years. Also, a SMRT-based assembly of Landsberg *erecta* has  
33 been generated that allowed to access translocation and inversion polymorphisms between  
34 two genotypes of one species.

35 **Results**

36 Here we provide a chromosome-arm level assembly of the *A. thaliana* accession  
37 Niederzenz-1 (AthNd-1\_v2) based on SMRT sequencing data. The assembly comprises 26  
38 nucleome sequences and displays a contig length of up to 16 Mbp. Compared to an earlier  
39 Illumina short read-based NGS assembly (AthNd-1\_v1), a 200 fold increase in continuity was  
40 observed for AthNd-1\_v2. To assign contig locations independent from the Col-0 reference  
41 sequence, we used genetic anchoring to generate a truly *de novo* assembly. In addition, we  
42 assembled the chondrome and plastome sequences.

43

44 **Conclusions**

45 Detailed analyses of AthNd-1\_v2 allowed reliable identification of large genomic  
46 rearrangements between *A. thaliana* accessions contributing to differences in the gene sets  
47 that distinguish the genotypes. One of the differences detected identified a gene that is  
48 lacking from the Col-0 reference sequence. This *de novo* assembly will extent the known  
49 proportion of the *A. thaliana* pan-genome.

50

51

52

53 **Background**

54 **Introduction**

55 *Arabidopsis thaliana* became the most important model for plant biology within decades due  
56 to properties valuable for basic research like short generation time, small footprint or a small  
57 genome [1]. Even before the availability of DNA sequencing technologies the *A. thaliana*  
58 genome was studied by biochemical methods like reassociation kinetics [2], quantitative gel  
59 blot hybridization [3], Feulgen photometry, flow cytometry [4, 5], chromatin staining,  
60 fluorescence *in situ* hybridization and southern blotting [6]. Molecular biology studies  
61 indicated a genome size between 145 Mbp [4] and 160 Mbp [5] as well as a GC content of  
62 40.3% [5]. Construction of genomic clones in vectors like phage lambda derivatives and  
63 genome blotting without knowing the actual sequence revealed insights into genome  
64 sequence complexity. Examples are the detection of about 570 copies of the 45S  
65 transcription unit (rDNA) and 660 chloroplast genome copies per cell [7]. By *in situ*  
66 hybridization Chromosome 1 and 5 were classified as metacentric, chromosomes 2 and 4 as  
67 acrocentric with nucleolus organizing regions (NORs) located at the short arms, and  
68 chromosome 3 was shown to be submetacentric [8]. Moreover, rDNA position  
69 polymorphisms between *A. thaliana* accessions were detected [8]. Different genetic maps  
70 were constructed, initially mainly based on restriction fragment length polymorphism (RFLP)  
71 and cleaved amplified polymorphic sequences (CAPS) markers [9, 10]. High resolution  
72 genetic maps were developed based on recombinant inbred lines (RILs) derived from  
73 crosses of Col-0 and Landsberg *erecta* (*Ler*) [11]. The impact and position of genomic  
74 features like the recombination reduction by NORs on the short chromosome arms of  
75 chromosome 2 and chromosome 4 and the centromere positions were investigated by tetrad  
76 analysis [12]. Genetic maps provided the scaffold for the positioning and orienting of  
77 continuous DNA sequences or contigs [5] leading to chromosome-level physical maps and  
78 centromere size estimations [13]. Gene and genome duplication events were studied based  
79 on BAC sequences prior to completion of the reference genome [14]. Generated by a BAC-  
80 by-BAC approach, the almost 120 Mbp long Col-0 reference sequence is currently the most

81 accurate plant genome sequence [15]. However, even this excellent high-quality nuclear  
82 genome sequence contains remaining gaps in almost inaccessible regions like repeats in the  
83 centromeres [13], at the telomeres and throughout NORs. The most recent genome  
84 annotation in Araport11 [16], which served as reference annotation for this study, contains  
85 27,445 protein encoding nuclear genes as well as 31,189 transposable element sequences.  
86 Information about genomic differences between *A. thaliana* accessions were mostly derived  
87 from short read data [17, 18]. The average proportion sequenced per line was around 100  
88 Mbp covering 84% of the Col-0 reference sequence [19]. However, selected accessions  
89 were sequenced much deeper leading to an almost reference-size assembly [17, 20, 21].  
90 The identification of structural variants had an upper limit of 40 bp for most of the  
91 investigated accessions [19]. Larger insertions and deletions, which will often result in  
92 presence/absence variations of entire genes, are often missed in short read data sets [22].  
93 Arabidopsis assembly continuity was significantly increased from high quality reference-  
94 guided assemblies [17] over *de novo* assemblies [20, 21] to most recent assemblies reaching  
95 chromosome-level quality [23].

96

97 The assembly concept of whole genome shotgun sequencing which relies on contigs created  
98 from overlapping sequence reads shorter than many repeat sequences and subsequent  
99 scaffolding is now challenged by new technical developments. The strong increase in the  
100 length of sequencing reads that was technically realized during the last years is enabling new  
101 assembly approaches [24, 25]. Despite the high error rate of about 11 to 15% 'Single  
102 Molecule, Real Time' (SMRT) sequencing reads significantly improve the continuity of *de*  
103 *novo* assemblies due to an efficient correction of the almost unbiased errors [26-28],  
104 provided that sufficient read coverage is available. SMRT sequencing offered by PacBio  
105 results routinely in average read lengths above 10 kbp [20, 29, 30]. These long reads were  
106 incorporated into high quality hybrid assemblies involving Illumina short read data [23, 30],  
107 but increasing sequencing output supports the potential for so called 'PacBio only  
108 assemblies' [20, 27, 31, 32].

109

110 Since the routine construction of very high quality assemblies becomes more feasible,  
111 methods for genome sequence comparison, especially for the comparison of multiple  
112 sequences in one alignment, need to be developed [33, 34]. Reciprocal best BLAST hits  
113 (RBHs) are a suitable way to analyze the synteny of two genomes by identifying homologous  
114 sequences [35, 36]. Each RBH pair consists of two sequences, one from each of the two  
115 genome sequences to compare, which displays the highest scoring hit in the other data set in  
116 a reciprocal manner [37]. These RBH pairs can be used to guide an assembly [21].

117

118 Here we provide a SMRT sequencing-based *de novo* genome assembly of Nd-1 comprising  
119 contigs of chromosome-arm size anchored to chromosomes and orientated within  
120 pseudochromosome sequences based on genetic linkage information. The application of  
121 long sequencing reads abolished limitations of short read mapping and short read  
122 assemblies for genome sequence comparison. Based on this genome sequence assembly,  
123 we identified genomic rearrangements between Col-0 and Nd-1 ranging from a few kbp up to  
124 one Mbp. Gene duplications between both accessions as well as 'private' genes in Nd-1 and  
125 Col-0 were revealed by this high quality sequence. The current assembly version  
126 outperforms the Illumina-based version (AthNd-1\_v1) about 200 fold with respect to  
127 assembly continuity [21] and is in the same range as the recently released Ler genome  
128 sequence assembly [23].

129

130

## 131 **Methods**

### 132 **Plant material**

133 Niederzenz-1 (Nd-1) seeds were obtained from the European Arabidopsis Stock Centre  
134 (NASC; stock number N22619). The DNA source was the same as described earlier [21].

135

### 136 **DNA extraction**

137 The DNA isolation procedure was a modified version of previously published protocols  
138 (AdditionalFile1) [32, 38] and started with 5 g of frozen leaves.

139

#### 140 **Library preparation and sequencing**

141 Sequencing for *de novo* assembly was performed using PacBio RS II (Menlo Park, CA,  
142 USA). Five microgram high molecular weight DNA without further fragmentation was used to  
143 prepare a SMRTbell library with PacBio SMRTbell Template Prep Kit 1 (Pacific Biosciences,  
144 Menlo Park, CA, USA) according to the manufacturer's recommendations. The resulting  
145 library was size-selected using a BluePippin system (Sage Science, Inc. Beverly, MA, USA)  
146 to enrich for molecules larger than 11 kbp. The recovered library was again damage repaired  
147 and then sequenced on a total of 25 SMRT cells with P6-C4v2 chemistry and by MagBead  
148 loading on the PacBio RSII system (Pacific Biosciences, Menlo Park, CA, USA) with 360 min  
149 movie length.

150

#### 151 **Assembly parameters**

152 A total of 1,972,766 subreads with an N50 read length of 15,244 bp and containing  
153 information about 16,798,450,532 bases were generated. Assuming a genome size of 150  
154 Mbp, the data cover the genome at 112 fold.

155 Read sequences derived from the plastome [GenBank: AP000423.1] or chondrome  
156 [GenBank: Y08501.2] were extracted from the raw data set by mapping to the respective  
157 sequence of Col-0 as previously described [39]. Canu v1.4 [40] was used for the assembly of  
158 the organell genome sequences. Scaffolding of initial contigs was performed with SSPACE-  
159 LongRead v1.1 [41]. The quality of both assemblies was checked by mapping of NGS reads  
160 from Nd-1 [21] and Col-0 [42]. Manual inspection and polishing with Quiver [32] let to the final  
161 sequences. The start of the Nd-1 plastome and chondrome sequences was set according to  
162 the corresponding Col-0 plastome and chondrome sequences to ease comparisons. Finally,  
163 small assembly errors were corrected via CLC basic variant detection based on mapped

164 Illumina paired-end reads (SRX1683594, [21]) and PacBio reads. Sequence properties like  
165 GC content and GC skew were determined and visualized by CGView [43].

166 A total of 166,600 seed reads consisting of 4,500,092,354 nt (N50 = 26,295 nt) covering the  
167 expected 150 Mbp genome sequence were used for the assembly thus leading to a  
168 coverage of 30 fold (see AdditionalFile2 for details). Release version 1.7.5 of the FALCON  
169 assembler <https://github.com/PacificBiosciences/FALCON/> [32] was used for a *de novo*  
170 assembly (see AdditionalFile3 for parameters) of the nuclear genome sequence. Resulting  
171 contigs were checked for contaminations with bacterial sequences and organell genome  
172 sequences as previously described [21]. Small fragments with low coverage were removed  
173 prior to polishing and error correction with Quiver [32].

174

175

#### 176 **Construction of pseudochromosomes based on genetic information**

177 All assembled contigs were sorted and orientated based on genetic linkage information  
178 derived from 63 genetic markers (AdditionalFile4, AdditionalFile5, AdditionalFile6), which  
179 were analyzed in about 1,000 F2 plants, progeny of reciprocal crossing of Nd-1xCol-0 and  
180 Col-0xNd-1. Genetic markers belong to three different types: (1) fragment length  
181 polymorphisms, which can be distinguished by agarose gel electrophoresis, (2) small  
182 nucleotide polymorphisms which can be distinguished by Sanger sequencing and (3) small  
183 nucleotide polymorphisms, which were identified by high resolution melt analysis. Design of  
184 oligonucleotides was performed manually and using Primer3Plus [44]. DNA for genotyping  
185 experiments was extracted from *A. thaliana* leaf tissue using a cetyltrimethylammonium  
186 bromide (CTAB) based method [45]. PCRs were carried out using GoTaq G2 DNA  
187 Polymerase (Promega) generally based on the suppliers' protocol. The total reaction volume  
188 was reduced to 15  $\mu$ l and only 0.2u of the polymerase were used per reaction. Sizes of  
189 amplicons generated were checked on an agarose gels. If required, samples were purified  
190 for sequencing by ExoSAP-IT (78201.1.ML ThermoFisher Scientific) treatment as previously  
191 described [46]. Sanger sequencing on ABI3730XL was applied to identify allele-specific

192 SNPs for the genotyping. Manual inspection of gel pictures and electropherograms lead to  
193 genotype calling. High resolution melt analysis was performed on a CFX96 Touch Real-Time  
194 PCR Detection System (BioRad) using the Precision Melt Supermix according to suppliers  
195 instructions (BioRad).

196 All data were combined and processed by customized Python scripts to calculate  
197 recombination frequencies between genetic markers. Linkage of genetic markers provided  
198 information about relationships of assembled sequences. The north-south orientation of the  
199 chromosomes was transferred from the reference sequence based on RBH support.  
200 Afterwards, contigs were joined into pseudochromosome sequences (AthNd-1\_v2). The  
201 produced research data, that is the basis for this article, is available upon request.

202

### 203 **Genome structure investigation**

204 Characteristic elements of the Nd-1 genome sequence were annotated by mapping of known  
205 sequences as previously described [21]. Fragments and one complete 45S rDNA unit were  
206 discovered based on gi|16131:848-4222 and gi|16506:88-1891. AF198222.1 was subjected  
207 to a BLASTn for the identification of 5S rDNA sequences. Telomeric repeats were used to  
208 validate the assembly completeness at the pseudochromosome end as well as centromere  
209 positions as previously described [21].

210

### 211 **BUSCO analysis**

212 BUSCO [48] was run on the Nd-1 pseudochromosomes and on the Col-0 reference  
213 sequence to produce a gold standard for Arabidopsis. AUGUSTUS 3.2.1 [49] was applied  
214 with previously described parameters [21]. The 'embryophyta\_odb9' was used as reference  
215 gene set.

216

### 217 **Genome sequence alignment**

218 Nd-1 pseudochromosome sequences were aligned to the Col-0 reference sequence [15] via  
219 nucmer [50] using parameters described in [23]. The aligned blocks were extracted via show-



220 coords function. The longest path of allelic blocks was identified by custom python scripts.  
221 Blocks were classified as allelic, transposition or inversion according to the Col-0 reference  
222 sequence [15]. Classified blocks were merged with adjacent blocks of the same type.

223

#### 224 **Gene prediction and RBH analysis**

225 AUGUSTUS 3.2.1 [49] was applied to the Nd-1 assembly AthNd-1\_v2 with previously  
226 optimized parameters [46]. Afterwards, the identification of RBHs at the protein sequence  
227 level between Nd-1 and Col-0 (Araport11, representative peptide sequences) was carried out  
228 with a custom python script as previously described [21].

229 Additionally, gene prediction was run on the nucleome TAIR10 reference sequence [15] as  
230 well as on the Ler chromosome sequences [23]. Parameters were set as described before to  
231 generate two control data sets.

232

#### 233 **Transposable element annotation**

234 All annotated transposable element (TE) regions of Araport11 (derived from TAIR) [16] were  
235 mapped via BLASTn to the Nd-1 assembly AthNd-1\_v2 and against the Col-0 reference  
236 sequence. The top BLAST score for each element in the mapping against the Col-0  
237 reference sequence was identified. All hits against Nd-1 with at least 90% of this top score  
238 were considered for further analysis. Overlapping hits were removed to annotate a final TE  
239 set. All predicted Nd-1 genes which overlapped TEs with more than 80% of their gene space  
240 were flagged as putative TE genes.

241

#### 242 **Identification of gene copy number variations**

243 A BLASTn search of all Col-0 exon sequences against the Nd-1 genome assembly sequence  
244 AthNd-1\_v2 and of all predicted Nd-1 exon sequences against the Col-0 reference sequence  
245 was used to determine copy number variations of genes. Only non-overlapping hits were  
246 considered for the following analysis. Genes were considered to be duplicated if at least half  
247 of their exons were found more than once. At5g12370 [51] served as an internal control,

248 because the duplication of this *A. thaliana* gene is collapsed in the Col-0 reference sequence  
249 but resolved in the Nd-1 genome sequence assembly. Duplication candidates were  
250 functionally annotated based on the Araport11 [16] information. Afterwards, putative  
251 transposable element genes were removed based on the annotation or the overlap with  
252 annotated transposable element sequences (AdditionalFile7), respectively. Duplications were  
253 classified as ‘tandem’ if the distance between both copies was smaller than 1 Mbp. Distances  
254 between genes and the next TEs were measured from the center of each feature to  
255 determine the impact of TEs on gene duplications. Finally, g:profiler  
256 <http://biit.cs.ut.ee/gprofiler/> [52] was applied to identify significantly overrepresented genes in  
257 Col-0 and Nd-1.

258 Beside genes with changed copy numbers, protein coding genes unique to each accession  
259 were identified. Annotated genes in AthNd-1\_v2, which were absent from the TAIR10  
260 reference genome sequence, were considered as unique to Nd-1. To avoid assembly-related  
261 issues in the identification of unique Col-0 genes, we searched the peptide sequences of all  
262 potential unique Col-0 genes against the complete set of Nd-1 subreads.

263

#### 264 **Validation of rearrangements and duplications**

265 LongAmpTaq (NEB) was used for the generation of large genomic amplicons up to 18 kbp  
266 based on the suppliers’ protocol. Sanger sequencing was applied for additional confirmation  
267 of generated amplicons. The amplification of small fragments and the following procedures  
268 were carried out with standard polymerases as previously described [21].

269

#### 270 **Investigation of collapsed region**

271 The region around At4g22214 was amplified in five overlapping parts using the Q5 High  
272 Fidelity polymerase (NEB) with genomic DNA from Col-0. Amplicons were checked on  
273 agarose gels and finally cloned into pCR2.1 (Invitrogen) or pMiniT 2.0 (NEB), respectively,  
274 based on the suppliers’ recommendations. Cloned amplicons were sequenced on an  
275 ABI3730XL by primer walking. Sequencing reads were assembled using CLC

276 GenomicsWorkbench (v. 9.5 CLC bio). In addition, 2x250 nt paired-end Illumina reads of Col-  
277 0 [42] were mapped to correct small variants in the assembled contigs and to close a small  
278 gap between cloned amplicons.

279

#### 280 **Identification of structural variants**

281 The distances between all syntenic neighboring RBHs were taken into account to identify  
282 structural variants above 10 kbp in length. Differences in the distance between two  
283 neighboring genes in the Col-0 genome and the corresponding neighboring genes in the Nd-  
284 1 genome indicate a structural variation between them. Spearman correlation coefficient was  
285 calculated using the implementation in the Python module scipy to validate the indication of  
286 increased numbers of SV around the centromeres.

287

#### 288 **Analysis of gaps in the Col-0 reference sequence**

289 Flanking sequences of gaps in the Col-0 reference sequence were submitted to a BLASTn  
290 against the Nd-1 genome sequence. Nd-1 sequences enclosed by hits of pairs of 30 kbp  
291 long flanking sequences from Col-0 were extracted. Homotetramer frequencies were  
292 calculated for all sequences and compared against the frequencies in randomly picked  
293 sequences. A Mann-Whitney U test was applied to analyze the difference between both  
294 groups.

295

296

### 297 **Results**

#### 298 **Nd-1 genome**

299 The final *A. thaliana* Nd-1 assembly (AthNd-1\_v2) comprised 119.5 Mbp (Table 1). AthNd-  
300 1\_v2 exceeds the previously reported assembly version AthNd-1\_v1 by 2.5 Mbp, while  
301 reducing the number of contigs by a factor of about 200.

302 The plastome and chondrome sequences comprise 154,443 bp and 368,216 bp, respectively  
303 (available upon request). A total of 148 small variants were identified from a global alignment

304 between the Nd-1 and Col-0 plastome sequences. General sequence properties like GC  
305 content and GC skew (AdditionalFile8, AdditionalFile9) are almost identical to the plastome  
306 and chondrome of Col-0. Nevertheless, there are some rearrangements between the  
307 chondrome sequences of Nd-1 and Col-0.

308

309

310 The high assembly quality and completeness of AthNd-1\_v2 is supported by the detection of  
311 99.9% of all BUSCO genes detected in Col-0 (AdditionalFile10). Only two genes are missing  
312 in the Nd-1 assembly AthNd-1\_v2, which are partly present in the Col-0 reference sequence.  
313 These genes are EOG09360D4T (At3g01060) and EOG09360DFK (At5g01010) located at  
314 the very north end of chromosome 3 and chromosome 5, respectively. Both regions are not  
315 represented in AthNd-1\_v2, but can be detected in the subreads. Amplification via PCR and  
316 Sanger sequencing of the PCR products confirmed the presence of both genes in the Nd-1  
317 genome. NGS read mappings did not indicate any complications at the end of both  
318 sequences.

319 Pseudochromosomes were constructed truly *de novo* from 3-7 contigs based on genetic  
320 linkage information. They reach similar lengths as the corresponding chromosome  
321 sequences in the Col-0 reference sequence. The Nd-1 genome sequence AthNd-1\_v2  
322 contains a complete 45S rDNA unit on pseudochromosome 2 as well as several fragments of  
323 additional 45S rDNA units on pseudochromosomes 2, 4, and 5 (Fig. 1). Centromeric and  
324 telomeric repeat sequences as well as 5S rDNA sequences were detected at centromere  
325 positions. Completeness of the assembled sequences representing the north of chromosome  
326 1 and the south of chromosome 3 were confirmed by the occurrence of telomeric repeat  
327 sequences (Fig. 1).

328

329

### 330 **Genome structure differences**

331 Sequence comparison between AthNd-1\_v2 and the Col-0 reference sequence revealed a  
332 large inversion on chromosome 4 involving about 1 Mbp (Fig. 2). The left break point is at  
333 1,631,539 bp and the right break point at 2,702,549 bp on NdChr4. The inverted sequence is  
334 120,543 bp shorter than the corresponding Col-0 sequence. PCR amplification of both  
335 inversion borders (AdditionalFile11) and Sanger sequencing of the generated amplicons was  
336 used to validate this rearrangement.

337

338

339 The recombination frequency in this region was analyzed using the marker pair M84/M74.  
340 Only a single recombination was observed between these markers while investigating 60  
341 plants. Moreover, only 8 recombination events in 108 plants were observed between another  
342 pair of markers, spanning a larger region (AdditionalFile5). In contrast, the average  
343 recombination frequency per Mbp at the corresponding position on other chromosomes was  
344 between 12%, observed for M31/M32, and 18%, observed for M13/M14. Statistical analysis  
345 revealed a significant difference in the recombination frequencies between the corresponding  
346 positions on different chromosomes ( $p < 0.001$ , `prop.test()` in R) supporting the hypothesis of a  
347 reduced recombination rate across the inversion on chromosome 4.

348 Comparison of a region on Chr2, which is probably of mitochondrial origin (mtDNA), in the  
349 Col-0 reference sequence with the Nd-1 genome sequence revealed a 300 kbp highly  
350 divergent region (Fig. 3). Sequences between position 3.20 Mbp and 3.29 Mbp on NdChr2  
351 display low similarity to the Col-0 sequence, while there is almost no similarity between 3.29  
352 Mbp and 3.48 Mbp. However, the length of both regions is roughly the same. Comparison  
353 against the Ler genome assembly revealed the absence of the entire region between 3.29  
354 Mbp and 3.48 Mbp on chromosome 2. The Nd-1 sequence from this region lacks continuous  
355 similarity to another place in the Col-0 or Nd-1 genome sequence. The 28 genes encoded in  
356 this region in Nd-1 show weak similarity to other Arabidopsis genes. Comparison of gene  
357 space sequences from this region against the entire Nd-1 assembly revealed some similarity  
358 on chromosome 3, 4, and 5 (AdditionalFile12).

359

360

361 An inversion on chromosome 3 which was described between Col-0 and Ler [23] is not  
362 present in Nd-1. The sequence similarity between Col-0 and Nd-1 is high in this region. In  
363 total, 175 structural variants larger than 10 kbp were identified between Col-0 and Nd-1. The  
364 genome-wide distribution of these variants indicated a clustering around the centromeres  
365 (AdditionalFile13). A Spearman correlation coefficient of  $-0.66$  ( $p = 1.7 \times 10^{-16}$ ) was calculated

366 for the correlation of the number of SVs in a given interval and the distance of this interval to  
367 the centromere (AdditionalFile14). Therefore, these large structural variants are significantly  
368 more frequent in the centromeric and pericentromic regions.

369

370

### 371 **Hint-based gene prediction**

372 Hint-based gene prediction using AUGUSTUS with the *A. thaliana* species parameter set on  
373 the Nd-1 pseudochromosomes resulted in 30,132 nuclear protein coding genes  
374 (GeneSet\_Nd-1\_v2.0) with an average transcript length of 1,573 bp (median), an average  
375 CDS length of 1,098 bp (median) and an average exon number per transcript of four  
376 (median). The number of predicted genes exceeds the number of annotated nuclear protein  
377 coding Col-0 genes in Araport11 (27,445) by 2,687. At the same time, the number of  
378 predicted genes is reduced compared to the GeneSet\_Nd-1\_v1.1 [46] by 702 genes.

379 As controls we run the gene prediction with same parameters on Col-0 and Ler chromosome  
380 sequences resulting in 30,352 genes and 29,302 genes, respectively. There were only minor  
381 differences concerning the average transcript and CDS length as well as the number of  
382 exons per gene.

383 Based on 31,748 annotated TEs in Nd-1 (AdditionalFile7) 2,738 predicted Nd-1 genes were  
384 flagged as putative TE genes (AdditionalFile15, AdditionalFile16). This number matches well  
385 with the difference between the predicted genes in Nd-1 and the annotated protein coding  
386 genes in Araport11, which is supposed to be free of TE genes.

387

### 388 **Detection of gene space differences between Nd-1 and Col-0**

389 A BLASTp-based comparison of all predicted Nd-1 peptide sequences and Col-0 Araport11  
390 representative peptide sequences in both directions revealed 24,572 reciprocal best hits  
391 (RBHs). In total, 89.6% of all 27,445 nuclear Col-0 genes are represented in this RBH set.  
392 Analysis of the colinearity of the genomic location of all 24,572 RBHs (see AdditionalFile17  
393 for a list) between Nd-1 and Col-0 showed overall synteny of both genomes as well as an

394 inversion on chromosome 4 (AdditionalFile18). While most RBHs are properly flanked by  
395 their syntenic homologs and thus lead to a diagonal positioning of points in the scatter plot,  
396 there are 242 outliers (see AdditionalFile19 for a list). Outliers were distinguished into 214  
397 “random” outliers (green), which have multiple BLASTp hits of similar quality for genes at  
398 different locations in the genome sequence, and 28 “real” outliers (red), which display a  
399 unique BLASTp hit. In general, outliers occur frequently in regions around the centromeres.  
400 Positional analysis revealed an involvement of most “real” outliers in the large inversion on  
401 chromosome 4. An NGS read mapping at the positions of randomly selected “real” outliers  
402 was manually inspected and indicated rearrangements between Nd-1 and Col-0. Structural  
403 variants, which affect at least three different genes in a RBH pairs, were identified from the  
404 RBH analysis. Examples beside the previously mentioned 1.2 Mbp inversion on chromosome  
405 4 (*At4g03820-At4g05497*) are a translocation on chromosome 3 (*At3g60975-At3g61035*) as  
406 well as an inversion on chromosome 3 around *At3g30845*.

407 As a control we identified 25,454 (92.7%) RBHs between our gene prediction on Col-0 and  
408 the manually curated reference annotation Araport11. In addition, 24,302 (88.5 %) RBHs  
409 were identified between our gene prediction on the Ler assembly and the Col-0 reference  
410 sequence annotated in Araport11.

411 In total, 385 protein encoding genes (AdditionalFile20) were detected to be copied at least  
412 once in Nd-1 compared to the Col-0 reference sequence. This includes *SEC10* (*At5g12370*)  
413 [51] which was previously described as an example for a tandem gene duplication collapsed  
414 in the Col-0 reference sequence. However, this region was already properly represented in  
415 AthNd-1\_v1 [21]. Gene duplications of *At2g06555* (unknown protein), *At3g05530* (*RPT5A*)  
416 and *At4g11510* (*RALFL28*) in Nd-1 were confirmed by PCR amplification and Sanger  
417 sequencing of the sequences enclosed by both copies as well as through amplification of the  
418 entire event locus. On the other side, there are 394 predicted genes in Nd-1  
419 (AdditionalFile21) which appeared at least duplicated in Col-0. A functional annotation is  
420 missing for about half of the duplicated genes. ENSEMBL-based enrichment analysis



421 revealed significantly overrepresented functionalities due to different copy number of genes  
422 in Col-0 and Nd-1 (AdditionalFile22).

423 In addition to gene duplications, there were 43 genes unique to Nd-1 (AdditionalFile23) and  
424 42 genes unique to Col-0 (AdditionalFile24). Most of the gene functions were unknown and  
425 the functionally annotated genes were randomly distributed over different gene families and  
426 pathways. The length of the encoded peptides is shorter than the genome-wide average and  
427 some peptide sequences display long amino acid repeats. It has not escaped our notice that  
428 some of these genes might be gene prediction artifacts.

429

430

#### 431 **Hidden locus in Col-0**

432 *At4G22214* was identified as a gene duplicated in Nd-1 in our analysis. During experimental  
433 validation, we did not detect the expected difference between Col-0 and Nd-1 concerning the  
434 locus around *At4G22214*. However, the PCR results matched the expectation based on the  
435 Nd-1 genome sequence thus suggesting a collapsed gene sequence in the Col-0 reference  
436 sequence. This hypothesis was supported by PCR results with outwards facing primers (Fig.  
437 4). Cloning of the *At4g22214* region of Col-0 in five overlapping fragments was done to  
438 enable Sanger sequencing. The combination of Sanger and paired-end Illumina sequencing  
439 reads revealed a tandem duplication with modification of the original gene (Fig. 4). The  
440 copies were designated *At4g22214a* and *At4g22214b* based on their position in the genome  
441 (GenBank: MG720229). While *At4g22214b* almost perfectly matches the Araport11  
442 annotation of *At4g22214*, a significant part of the CDS of *At4g22214a* is missing. Therefore,  
443 the gene product of this copy is probably functionless.

444

445

446

#### 447 **Gaps in the Col-0 reference sequence**

448 Despite its very high quality, the Col-0 reference sequence contains 92 gaps of varies sizes  
449 representing regions of unknown sequence like the NOR clusters or centromeres. Ath-  
450 Nd1\_v2 enabled the investigation of some of these sequences based on homology  
451 assumptions. A total of 22 Col-0 gaps were spanned with high confidence by Ath-Nd1\_v2  
452 and therefore selected for homopolymer frequency analysis. The corresponding regions in  
453 Nd-1 are significantly enriched with homopolymers in comparison to randomly picked control  
454 sequences ( $p=0.000022$ , Mann-Whitney U test) (AdditionalFile 25).

455

456

## 457 **Discussion**

### 458 **Genome structure of the *A. thaliana* accession Nd-1**

459 In order to further investigate large variations in the range of several kbp up to several Mbp  
460 between *A. thaliana* accessions, we performed a *de novo* genome assembly for the Nd-1  
461 accession using long sequencing reads and cutting-edge assembly software. Based on  
462 SMRT sequencing reads the assembly continuity was improved by over 200 fold considering  
463 the number of contigs in the previously released NGS-based assembly [21]. Assembly  
464 statistics are comparable to other projects using similar data [23, 31, 53, 54]. Despite the  
465 very high continuity, regions like NORs still pose a major challenge. These sequences are  
466 not just randomly clustered repeats, but highly regulated [55]. Therefore, the identification of  
467 accession-specific differences could explain phenotypic differences. One NOR repeat unit  
468 sequence in the Nd-1 assembly is located at 2.5 Mbp on chromosome 2. If this repeat unit  
469 indicates a NOR position, this would be a structural difference to Col-0 where the NOR2 is  
470 located at the very north end [56]. In addition to NORs, the assembly of chromosome ends  
471 remains still challenging, since the absence of some telomeric sequences in a high quality  
472 assembly was observed before [23]. Despite the absence of challenging repeats, regions  
473 close to the telomeres including the genes EOG09360D4T (At3g01060) and EOG09360DFK  
474 (At5g01010) were not assembled by FALCON although sequence reads covering these  
475 regions were present in the input data.

476

## 477 **Genome sequence differences**

478 The increased continuity of this long read assembly was necessary to discover an 1 Mbp  
479 inversion through sequence comparison as well as RBH analysis. An earlier Illumina short  
480 read based assembly [21] lacked sufficient continuity in the region of interest to reveal both  
481 breakpoints of this variant between Col-0 and Nd-1 in one contig. The large inversion at the  
482 north of chromosome 4 is a modification of the allele originally detected in *Ler* [23, 57]. The  
483 Nd-1 allele is different from the *Ler* allele. This could explain previous observations in several  
484 hundred *A. thaliana* accessions, which share the left inversion border with *Ler*, but show a  
485 different right inversion border [23].

486 Despite the long read length, there are only very small parts of pericentromeric sequences  
487 represented in the assembly. Assuming an almost complete absence of centromere and  
488 NOR sequences from the assembly, the true genome size is matching earlier predictions of  
489 around 145-160 Mbp, which were calculated based on flow cytometry [4, 5] and adjusted  
490 towards the lower end of this range in more recent estimations [21]. Since genome size  
491 differences between accessions have been reported, the investigation of different accessions  
492 might explain some of the observed discrepancies [58]. Detection of telomeric or centromeric  
493 sequences, respectively, at the end of pseudochromosomes indicated the completeness of  
494 the Ath-Nd1\_v2 assembly at these points. Almost 20 years after the release of the first  
495 chromosome sequences of *A. thaliana*, we are still not able to assemble complete  
496 centromere sequences continuously. However, absence of telomeric sequences from some  
497 pseudochromosome ends was observed before even for a very high quality assembly [23].  
498 Detected telomeric repeats at the centromere positions support previously reported  
499 hypothesis about the evolution of centromeres out of telomere sequences [59].

500 Sequence differences observed on chromosome 2 between Col-0 and Nd-1 could be due to  
501 the integration of mtDNA into the chromosome 2 of Col-0 [15]. This region was reported to be  
502 collapsed in the Col-0 reference genome sequence, thus harboring about 600 kbp of DNA  
503 from the chondrome instead of the 270 kbp represented in the reference genome sequence

504 [60]. Since Nd-1 genes of this region show similarity to gene clusters on other chromosomes,  
505 they could be relicts of a whole genome duplication as reported before for several regions of  
506 the Col-0 reference sequence [61]. This difference on chromosome 2 is only one example for  
507 a large variant between Col-0 and Nd-1. Clusters of structural variants around centromeres  
508 could be explained by transposable elements and pseudogenes which were previously  
509 reported as causes for intra-species variants in these regions [6, 60].

510

511 Size and structure of the Nd-1 plastome is very similar to Col-0 [15] or *Ler* [39]. In  
512 accordance with the overall genome similarities, the observed number of small differences  
513 between the plastome sequences of Col-0 and Nd-1 is slightly higher than the value reported  
514 before for the Col-0 comparison to *Ler* [39].

515 The size of the Nd-1 chondrome matches previously reported values for the large chondrome  
516 configuration of other *A. thaliana* accessions [62]. Large structural differences between the  
517 Col-0 chondrome [62] and the Nd-1 chondrome could be due to the previously described  
518 high diversity of this subgenome including the generation of substoichiometric DNA  
519 molecules [63, 64]. In addition, the mtDNA level was reported to differ between cell types or  
520 cells of different ages within the same plant [65, 66]. The almost equal read coverage of the  
521 assembled Nd-1 chondrome could be explained by the young age of the plants at the point of  
522 DNA isolation, as the amount of all chondrome parts should be the same in young leafs [66].

523

524

525

## 526 **Nd-1 gene space**

527 Many diploid plant genomes contain close to 30,000 protein encoding genes [67] with the  
528 *Arabidopsis* genome harboring 27,655 genes according to the most recent annotation [16].  
529 Since there are only two other chromosome-level assembly sequences of *A. thaliana*  
530 available at the moment, we do not know the precise variation range of gene numbers  
531 between different accessions. The number of 30,132 predicted genes in Nd-1 is further

532 supported by the identification of 24,572 RBHs with the Araport11 [16] annotation of the Col-  
533 0 reference sequence. This number exceeds the values reported for Nd-1 before [21, 46] as  
534 well as the matches between Col-0 and Ler-0 [23]. Incorporation of hints improved the gene  
535 prediction on the NGS assembly sequence AthNd-1\_v1.0 [46] and was therefore applied  
536 again. Our chromosome-level assembly further enhances the gene prediction quality as at  
537 least 89.6% of all Col-0 genes were recovered. Previous studies reported annotation  
538 improvements through an improved assembly sequence [68].

539 Due to the very high proportion of genes within the Arabidopsis genome assigned to  
540 paralogous groups with high sequence similarity [69, 70], we speculated that the  
541 identification of orthologous pairs via RBH analysis might be almost saturated. Gene  
542 prediction with the same parameters on the Col-0 reference sequences prior to a RBH  
543 analysis supported this hypothesis. Since there are even some RBHs at non-syntenic  
544 positions between our control Col-0 annotation and the Araport11 annotation, our Nd-1  
545 annotation is already of very high accuracy. The precise annotation of non-canonical splice  
546 sites via hints as described before [46] contributed to the new GeneSet\_Nd-1\_v2.0. Slightly  
547 over 200 genes at non-syntenic positions designated as 'outliers' in our RBH analysis  
548 highlight structural differences in the local genome structure.

549 Gene duplication and deletion numbers in Nd-1 and Col-0 are in the same range as  
550 previously reported values of up to a few hundred accession specific presence/absence  
551 variations of genes [23, 71]. Since we were searching genome wide for copies of a gene  
552 space without requiring an annotated feature in both genome sequences, both numbers  
553 might include some pseudo genes due to the frequent occurrence of these elements within  
554 plant genomes [72, 73]. Since all comparisons rely on the constructed sequences we cannot  
555 absolutely exclude that a small number of other genes were detected as amplified due to a  
556 collapsed sequences like SEC10 (At5G12370) [51]. Removing transposable element genes  
557 based on sequence similarity to annotated features should reduce the proportion of putative  
558 pseudo genes. However, it is impossible to clearly distinguish between real genes and  
559 pseudo genes in all cases, because even genes with a premature stop codon or a frameshift

560 mutation could function as a truncated versions or give rise to regulatory RNAs [70, 73-75].  
561 In addition, the impact of copy number variations involving protein encoding genes in  
562 Arabidopsis might be higher than previously assumed thus supporting the existence of  
563 multiple gene copies [76]. Gene expression analysis could support the discrimination of  
564 pseudo genes, because low gene expression in Arabidopsis was reported to be associated  
565 with pseudogenization [77]. Despite the unclear status of the gene product, the pure  
566 presence of these sequences revealed fascinating insights into genome evolution and  
567 contributed to the pan-genome [78, 79].

568 To detect the most important gene differences between Col-0 and Nd-1 without a strong bias  
569 through the applied prediction mechanisms [14], we searched via tBLASTn for genes  
570 completely absent from the other genome sequence. The number of 43 unique genes in Nd-  
571 1 (AdditionalFile23) and 42 unique genes in Col-0 (AdditionalFile24) are in accordance with  
572 the number of 40 genes in Ler-0 and 63 genes in Col-0, respectively, reported before [23].  
573 Since the fast evolution of plant genomes [70, 80] is mainly based on gene duplications,  
574 presence/absence variations should have a severe impact. Moreover, harboring over 60% of  
575 genes with paralogous copies in the same genome [70, 81] makes copy number alterations  
576 more likely [76] to occur than the loss of a single copy gene. Changing the function of  
577 redundant gene copies e.g. derived from whole genome duplications [67, 82, 83] or  
578 transposon-mediated duplications [84, 85] poses a much higher potential for the acquisition  
579 of new functions than the *de novo* emergence of so called orphan genes from intergenic  
580 regions [70, 86, 87]. Orphan genes are frequently defined as unique to a specific  
581 phylogenetic lineage [88, 89]. The identification of these genes originating from non-coding  
582 sequences is challenging e.g. due to unique structural properties [90] or fragmented  
583 assemblies [68]. Sufficient information about genome sequences of closely related species is  
584 needed to distinguish *de novo* developed orphan genes e.g. from gene duplications with a  
585 following deletion of the original gene copy [88]. Orphan genes were previously described as  
586 a potential source of species-specific differences [89, 91] posing one explanation for  
587 accession-specific phenotypic differences. Functional analysis of the orphan genes identified

588 in the high quality genome assemblies of the first *A. thaliana* accessions with a high quality  
589 genome assembly is needed to check if this holds true for phenotypic differences between  
590 plant accessions. It will be interesting to see if the rise of novel genes is more important for  
591 speciation events than the accumulation of mutations in existing genes.

592

593

## 594 **Conclusions**

595 We report a high quality long read *de novo* assembly (AthNd-1\_v2) of the *A. thaliana*  
596 accession Nd-1, which improved significantly on the previously released NGS assembly  
597 sequence AthNd-1\_v1.0 [21]. Comparison of the GeneSet\_Nd-1\_v2.0 with the Col-0  
598 reference sequence genes revealed 24,572 RBHs supporting an overall synteny between  
599 both *A. thaliana* accessions except for an 1 Mbp inversion at the north of chromosome 4.  
600 Moreover, large structural variants were identified in the pericentromeric regions.  
601 Comparisons with the reference sequence also lead to the identification of the collapsed  
602 locus around At4g22214 in the Col-0 reference sequence. Therefore, this work contributes to  
603 the increasing *A. thaliana* pan-genome with significantly extended details about genomic  
604 rearrangements.

605

## 606 **List of abbreviations**

607 NGS next generation sequencing

608 NOR nucleolus organizing region

609 RBH reciprocal best hit

610 SMRT single molecule real time

611

612

## 613 **Declarations**

### 614 **Ethics approval and consent to participate**

615 Not applicable

616

617 **Consent for publication**

618 Not applicable

619

620 **Availability of data and materials**

621 The data sets supporting the results of this article are included within the article and its  
622 additional files. The Ath-Nd-1\_v2 assembly is available upon request. Sequencing reads  
623 were submitted to the SRA (SRP066294).

624

625

626 **Competing interest**

627 The authors declare that they have no competing interest.

628

629 **Funding**

630 We acknowledge the financial support of the German Research Foundation (DFG) and the  
631 Open Access Publication Fund of Bielefeld University for the article processing charge. The  
632 funding body did not influence the design of the study, the data collection, the analysis, the  
633 interpretation of data, or the writing of the manuscript.

634

635 **Author's contributions**

636 BP, DH and BW conceived and designed research. BP, KS, KF, BH and RR conducted  
637 experiments. BP, DH and BW interpreted the data. BP and BW wrote the manuscript. All  
638 authors read and approved the final manuscript.

639

640 **Acknowledgements**

641 We thank Willy Keller for isolating high molecular DNA, Katharina Kemmet for extensive  
642 genotyping of plants for the genetic map, Helene Schellenberg, Ann-Christin Polikeit and



643 Prisca Viehöver for Sanger sequencing, and Melanie Kuhlmann as well as Andrea Voigt for  
644 taking excellent care of the plants.

645

646

647

648 **Additional Files**

649 **AdditionalFile1. Protocol for extraction of high molecular weight genomic DNA for**  
650 **SMRT sequencing.**

651 This protocol was used to extract high molecular genomic DNA from leaves of *A. thaliana*  
652 Nd-1 plants suitable for SMRT sequencing.

653

654 **AdditionalFile2. Sequencing Statistics.**

655 Statistical information about the generated SMRT sequencing data for the *A. thaliana* Nd-1  
656 genome assembly are listed in this table. The expected genome size is based on several  
657 analyses reporting values around 150 Mbp [4, 5].

658

659 **AdditionalFile3. FALCON assembly parameters.**

660 All parameters that were adjusted for the FALCON assembly of the Nd-1 nucleome are listed  
661 in this table. While most default parameters were kept, some were specifically adjusted for  
662 this plant genome assembly.

663

664 **AdditionalFile4. Molecular markers for genetic linkage analysis.**

665 All markers require the amplification of a genomic region using the listed oligonucleotides  
666 under the specified conditions (annealing temperature, elongation time). Depending on the  
667 fragment size differences, the resulting PCR products can allow the separation of both alleles  
668 by agarose gel electrophoresis (length polymorphism) or might require Sanger sequencing to  
669 investigate single SNPs.

670

671 **AdditionalFile5. Distribution of genetic markers over physical map.**

672 The positions of all genetic markers on the pseudochromosome sequences are illustrated.  
673 Assembled sequences were positioned based on the genetic linkage information. Some  
674 genetic marker combinations allowed the investigation of recombination frequencies within  
675 continuous sequences.

676

677 **AdditionalFile6. Oligonucleotide sequences for genetic linkage analysis.**

678 Sequences, names and recommended annealing temperatures of all oligonucleotides used  
679 in this work are listed in this table. Usage remarks for the oligonucleotides are provided as  
680 well.

681

682 **AdditionalFile7. Transposable element positions in the Nd-1 genome sequence.**

683 TE genes, TEs and TE fragments in the Nd-1 genome sequence were identified based on  
684 sequence similarity to annotated TEs from the Col-0 reference sequence (Araport11) [16].

685

686 **AdditionalFile8. Nd-1 plastome map.**

687 The GC content (black) and GC skew (green for positive GC skew, purple for negative GC  
688 skew) of the plastome sequence were analyzed by CGView [43]. The sequence and its  
689 properties are very similar to the Col-0 plastome sequence.

690

691 **AdditionalFile9. Nd-1 chondrome map.**

692 The GC content (black) and GC skew (green for positive GC skew, purple for negative GC  
693 skew) of the chondrome sequence were analyzed by CGView [43]. The sequence and its  
694 properties are very similar to the Col-0 chondrome sequence.

695

696 **AdditionalFile10. BUSCO analysis of the Col-0 and Nd-1 genome sequences.**

697 BUSCO v2.0 was run on the genomic sequences of Col-0 and Nd-1 using AUGUSTUS 3.2.1  
698 with default parameters for the gene prediction process. The main difference between both

699 gene sets is the absence of At3g01060 and At5g01010 from the Nd-1 genome assembly  
700 sequence. However, this is only caused by an assembly error, since the presence of these  
701 genes in the genome was validated by PCR and Sanger sequencing.

702

#### 703 **AdditionalFile11. Experimental validation of 1 Mbp inversion on chromosome 4.**

704 The identified inversion between Nd-1 and Col-0 on chromosome 4 is different from the  
705 inversion described before between Col-0 and Ler [23]. However, the left breakpoint is the  
706 same for both alleles enabling the use of previously published oligonucleotide sequences  
707 [23]. The right breakpoint was identified by manual investigation of sequence alignments.  
708 Both breakpoints were validated via PCR using the oligonucleotides as illustrated in (a)  
709 (AdditionalFile6). The results support the expected inversion borders (b).

710

#### 711 **AdditionalFile12. Genome-wide distribution of genes inserted on chromosome 2 in Nd-** 712 **1.**

713 Nd-1 and Col-0 display a highly diverged region at the north of chromosome 2, which is  
714 about 300 kbp long. BLASTn of the complete Nd-1 gene sequences from this region  
715 revealed several regions on other Nd-1 chromosomes with copies of these genes.

716

717

#### 718 **AdditionalFile13. Genome-wide distribution of large structural variants.**

719 The distribution of structural variants (SVs) >10 kbp (red dots) between Col-0 and Nd-1 over  
720 all five pseudochromosome sequences (black lines) is illustrated. Additionally, the assumed  
721 centromere (CEN) positions are indicated (blue dots). Most SVs are clustered in the (peri-  
722 )centromeric region.

723

#### 724 **AdditionalFile14. Clustering of SVs around centromeres.**

725 The correlation between the number of SVs in a given part of the genome sequence (1 Mbp)  
726 and the distance of this region to the centromere position is illustrated. SVs are clustered  
727 around the centromeres (Spearman correlation coefficient = -0.66, p-value =  $1.7 \times 10^{-16}$ ).

728

729 **AdditionalFile15. Transposable element overlap with GeneSet\_Nd-1\_v2.0.**

730 The overlap between annotated TEs (AdditionalFile7) and predicted protein coding genes  
731 was analyzed to identify TE genes. This figure illustrates the fraction of a gene that is  
732 covered by a TE. Since TEs might occur within the intron of a gene, only genes with at least  
733 80% TE coverage were flagged as transposable element genes (AdditionalFile16).

734

735 **AdditionalFile16. Transposable element genes in GeneSet\_Nd-1\_v2.0.**

736 These genes were predicted by AUGUSTUS as protein coding genes. Due to their positional  
737 overlap with TEs (AdditionalFile7), they were flagged as TE genes and excluded from further  
738 gene set analysis.

739

740 **AdditionalFile17. Reciprocal best hits (RBH) pairs between Col-0 and Nd-1.**

741 Reciprocal best hits between predicted peptide sequences of Nd-1 and the representative  
742 peptide sequences of Col-0 (Araport11).

743

744

745 **AdditionalFile18. Reciprocal best hits (RHB) indicates inversion between Nd-1 and**  
746 **Col-0.**

747 Genes in RBH pairs were sorted based on their position on the five pseudochromosomes of  
748 the two genome sequences to form the x (Col-0) and y (Nd-1) axes of this diagram. Plotting  
749 the positions of each RBH pair leads to a bisecting line of black dots representing genes at  
750 perfectly syntenic positions. Red and green dots indicate RBH gene pair positions deviating  
751 from the syntenic position. Red dots symbolize a unique match to another gene, while green  
752 dots indicate multiple very similar matches. Positions of the centromere (CEN4) on the  
753 chromosomes of both accessions are indicated by purple lines. An inversion involving 131  
754 genes in RBH pairs just north of CEN4 distinguishes Nd-1 and Col-0.

755

756 **AdditionalFile19. RBH outliers in GeneSet\_Nd-1\_v2.0.**

757 Reciprocal bidirectional best BLAST hits (RBHs) between the gene sets of Col-0 and Nd-1  
758 were identified. All 242 RBHs at positions deviating from the syntenic diagonal line were  
759 collected. The functional annotation of these genes was derived from Araport11.

760

761 **AdditionalFile20. Duplicated genes in Nd-1.**

762 The listed 385 Col-0 genes (Araport11 [16]) have at least two copies in Nd-1. Exons of these  
763 genes showed an increased copy number in Ath-Nd-1\_v2 compared to the Col-0 reference  
764 sequence. The annotation was derived from Araport11.

765

766 **AdditionalFile21. Duplicated genes in Col-0.**

767 The listed 394 Nd-1 genes have at least two copies in Col-0. Exons of these genes showed  
768 an increased copy number in the Col-0 reference sequence compared to Ath-Nd-1\_v2.

769

770 **AdditionalFile22. Duplicated genes with significantly enriched functions.**

771 Copied genes leading to significantly overrepresented functions in Col-0 or Nd-1,  
772 respectively. The listed genes are located in the center of networks which are significantly  
773 enriched in one accession due differences in the gene copy numbers. g:profiler [52]  
774 predicted the enrichment of specific functions in the set based on the ENSEMBL 89  
775 annotation.

776

777 **AdditionalFile23. List of unique Nd-1 genes in GeneSet\_Nd-1\_v2.0.**

778 tBLASTn of the encoded peptide sequenced did not reveal a significant hit against the Col-0  
779 reference genome sequence.

780

781 **AdditionalFile24. List of unique Col-0 genes in Araport11.**

782 tBLASTn of the encoded peptide sequenced did not reveal a significant hit against the Nd-1  
783 genome sequence or the Nd-1 subreads.

784

785 **AdditionalFile25. Critical regions in the Col-0 reference sequence.**

786 The high continuity of the Ath-Nd-1\_v2 assembly enabled the investigation of 22 sequences  
787 corresponding to gaps in the TAIR10 reference sequence (Col-0). This figure illustrates the  
788 homotetranucleotide occurrence in these sequences (red dots) in comparison to some  
789 randomly selected reference sequences (green dots). While there is a clear enrichment of  
790 homotetranucleotides in the gap-homolog sequences, there was no clear correlation  
791 between the length of a gap and the composition of the corresponding sequence observed.

792

793

794

795 **References**

- 796 1. Koornneef M, Meinke D: **The development of Arabidopsis as a model plant.** *Plant*  
797 *J* 2010, **61**(6):909-921.
- 798 2. Leutwiler LS, Hough-Evans BR, Meyerowitz EM: **The DNA of Arabidopsis thaliana.**  
799 *Molecular Genome and Genetics* 1984, **194**:15-23.
- 800 3. Francis DM, Hulbert SH, Michelmore RW: **Genome Size and Complexity of the**  
801 **Obligate Fungal Pathogen, Bremia lactucae.** *Experimental Mycology* 1990,  
802 **14**:299-309.
- 803 4. Arumuganathan K, Earle ED: **Nuclear DNA Content of Some Important Plant**  
804 **Species.** *Plant Mol Biol Reprtr* 1991, **9**(3):208-218.
- 805 5. Höfte H, Desprez T, Amselm L, Chiapello H, Caboche M, Moisan A, Jourjon M-F,  
806 Charpentau J-L, Berthomieu P, Guerrier D *et al*: **An inventory of 1152 expressed**  
807 **sequence tags obtained by partial sequencing of cDNAs from Arabidopsis**  
808 **thaliana.** *Plant J* 1993, **4**(6):1051-1061.
- 809 6. Fransz PF, Armstrong S, de Jong JH, Parnell LD, van Drunen C, Dean C, Zabel P,  
810 Bisseling T, Jones GH: **Integrated cytogenetic map of chromosome arm 4S of A.**  
811 **thaliana: structural organization of heterochromatic knob and centromere**  
812 **region.** *Cell* 2000, **100**(3):367-376.
- 813 7. Pruitt RE, Meyerowitz EM: **Characterization of the genome of Arabidopsis**  
814 **thaliana.** *J Mol Biol* 1986, **187**:169-183.
- 815 8. Fransz P, Armstrong S, Alonso-Blanco C, Fischer TC, Torres-Ruiz RA, Jones G:  
816 **Cytogenetics for the model system Arabidopsis thaliana.** *Plant J* 1998,  
817 **13**(6):867-876.
- 818 9. Chang C, Bowman JL, DeJohn AW, Lander ES, Meyerowitz EM: **Restriction**  
819 **fragment length polymorphism linkage map for Arabidopsis thaliana.** *Proc Natl*  
820 *Acad Sci USA* 1988, **85**:6856-6860.
- 821 10. Bell CJ, Ecker JR: **Assignment of 30 microsatellite loci to the linkage map of**  
822 **Arabidopsis.** *Genomics* 1994, **19**(1):137-144.
- 823 11. Lister C, Dean C: **Recombinant inbred lines for mapping RFLP and phenotypic**  
824 **markers in Arabidopsis thaliana.** *Plant J* 1993, **4**:745-750.
- 825 12. Copenhaver GP, Browne WE, Preuss D: **Assaying genome-wide recombination**  
826 **and centromere functions with Arabidopsis tetrads.** *Proceedings of the National*  
827 *Academy of Sciences of the United States of America* 1998, **95**(1):247-252.
- 828 13. Kumekawa N, Hosouchi T, Tsuruoka H, Kotani H: **The size and sequence**  
829 **organization of the centromeric region of Arabidopsis thaliana chromosome 5.**  
830 *DNA Res* 2000, **7**(6):315-321.
- 831 14. Blanc G, Barakat A, Guyot R, Cooke R, Delseny M: **Extensive duplication and**  
832 **reshuffling in the Arabidopsis genome.** *Plant Cell* 2000, **12**(7):1093-1101.
- 833 15. The Arabidopsis Genome Initiative: **Analysis of the genome sequence of the**  
834 **flowering plant Arabidopsis thaliana.** *Nature* 2000, **408**(6814):796-815.
- 835 16. Cheng CY, Krishnakumar V, Chan A, Thibaud-Nissen F, Schobel S, Town CD:  
836 **Araport11: a complete reannotation of the Arabidopsis thaliana reference**  
837 **genome.** *Plant J* 2017(89):789-804.
- 838 17. Schneeberger K, Ossowski S, Ott F, Klein JD, Wang X, Lanz C, Smith LM, Cao J,  
839 Fitz J, Warthmann N *et al*: **Reference-guided assembly of four diverse**  
840 **Arabidopsis thaliana genomes.** *Proceedings of the National Academie of Sciences*  
841 *of the United States of America* 2011, **108**(25):10249-10254.
- 842 18. Li YH, Zhou G, Ma J, Jiang W, Jin LG, Zhang Z, Guo Y, Zhang J, Sui Y, Zheng L *et*  
843 *al*: **De novo assembly of soybean wild relatives for pan-genome analysis of**  
844 **diversity and agronomic traits.** *Nat Biotechnol* 2014, **32**(10):1045-1054.
- 845 19. Consortium TG: **1,135 Genomes Reveal the Global Pattern of Polymorphism in**  
846 **Arabidopsis thaliana.** *Cell* 2016, **166**(2):481-491.
- 847 20. Kim KE, Peluso P, Babayan P, Yeadon PJ, Yu C, Fisher WW, Chin CS, Rapicavoli  
848 NA, Rank DR, Li J *et al*: **Long-read, whole-genome shotgun sequence data for**  
849 **five model organisms.** *Scientific Data* 2014, **1**:140045.

- 850 21. Pucker B, Holtgräwe D, Rosleff Sørensen T, Stracke R, Viehöver P, Weisshaar B: **A**  
851 **De Novo Genome Sequence Assembly of the Arabidopsis thaliana Accession**  
852 **Niederzenz-1 Displays Presence/Absence Variation and Strong Synteny.** *PLoS*  
853 *ONE* 2016, **11**(10):e0164321.
- 854 22. Huddleston J, Chaisson MJP, Steinberg KM, Warren W, Hoekzema K, Gordon D,  
855 Graves-Lindsay TA, Munson KM, Kronenberg ZN, Vives L *et al*: **Discovery and**  
856 **genotyping of structural variation from long-read haploid genome sequence**  
857 **data.** *Genome Res* 2017, **27**(5):677-685.
- 858 23. Zapata L, Ding J, Willing EM, Hartwig B, Bezdan D, Jiao WB, Patel V, Velikkakam  
859 James G, Koornneef M, Ossowski S *et al*: **Chromosome-level assembly of**  
860 **Arabidopsis thaliana Ler reveals the extent of translocation and inversion**  
861 **polymorphisms.** *Proc Natl Acad Sci USA* 2016.
- 862 24. Simpson JT, Pop M: **The Theory and Practice of Genome Sequence Assembly.**  
863 *Annual Review of Genomics and Human Genetics* 2015, **16**:153-172.
- 864 25. Rhoads A, Au KF: **PacBio Sequencing and Its Applications.** *Genomics Proteomics*  
865 *Bioinformatics* 2015, **13**(5):278-289.
- 866 26. Lam KK, Khalak A, D. T: **Near-optimal assembly for shotgun sequencing with**  
867 **noisy reads.** *BMC Bioinf* 2014, **15**:S4.
- 868 27. Koren S, Phillippy AM: **One chromosome, one contig: complete microbial**  
869 **genomes from long-read sequencing and assembly.** *Current Opinion in*  
870 *Microbiology* 2015, **23**:110-120.
- 871 28. Shoromony I, Courtade T, Tse D: **Do Read Errors Matter for Genome Assembly?**  
872 In: *IEEE International Symposium on Information Theory (ISIT)*. Hong Kong; 2015:  
873 919-923.
- 874 29. Koren S, Harhay GP, Smith TP, Bono JL, Harhay DM, Mcvey SD, Radune D,  
875 Bergman NH, Phillippy AM: **Reducing assembly complexity of microbial genomes**  
876 **with single-molecule sequencing.** *Genome Biol* 2013, **14**(9):R101.
- 877 30. Pendleton M, Sebra R, Pang AW, Ummat A, Franzen O, Rausch T, Stütz AM,  
878 Stedman W, Anantharaman T, Hastie A *et al*: **Assembly and diploid architecture of**  
879 **an individual human genome via single-molecule technologies.** *Nature Methods*  
880 2015, **12**(8):780-786.
- 881 31. Berlin K, Koren S, Chin CS, Drake JP, Landolin JM, Phillippy AM: **Assembling large**  
882 **genomes with single-molecule sequencing and locality-sensitive hashing.** *Nat*  
883 *Biotechnol* 2015, **33**(6):623-630.
- 884 32. Chin CS, Peluso P, Sedlazeck FJ, Nattestad M, Concepcion GT, Clum A, Dunn C,  
885 O'Malley R, Figueroa-Balderas R, Morales-Cruz A *et al*: **Phased diploid genome**  
886 **assembly with single-molecule real-time sequencing.** *Nature Methods* 2016,  
887 **13**(12):1050-1054.
- 888 33. Muir P, Li S, Lou S, Wang D, Spakowicz DJ, Salichos L, Zhang J, Weinstock GM,  
889 Isaacs F, Rozowsky J *et al*: **The real cost of sequencing: scaling computation to**  
890 **keep pace with data generation.** *Genome Biol* 2016, **17**(53).
- 891 34. Consortium. TCP-G: **Computational pan-genomics: status, promises and**  
892 **challenges.** *Briefings in Bioinformatics* 2016:1-18.
- 893 35. Li L, Stoeckert CJJ, Roos DS: **OrthoMCL: identification of ortholog groups for**  
894 **eukaryotic genomes.** *Genome Res* 2003, **13**(9):2178-2189.
- 895 36. Ward N, Moreno-Hagelsieb G: **Quickly finding orthologs as reciprocal best hits**  
896 **with BLAT, LAST, and UBLAST: how much do we miss?** *PLoS ONE* 2014,  
897 **9**(7):e101850.
- 898 37. Tatusov RL, Koonin EV, Lipman DJ: **A genomic perspective on protein families.**  
899 *Science* 1997, **278**(5338):631-637.
- 900 38. Healey A, Furtado A, Cooper T, Henry RJ: **Protocol: a simple method for**  
901 **extracting next-generation sequencing quality genomic DNA from recalcitrant**  
902 **plant species.** *Plant Methods* 2014, **10**(21).
- 903 39. Stadermann KB, Holtgräwe D, Weisshaar B: **Chloroplast Genome Sequence of**  
904 **Arabidopsis thaliana Accession Landsberg erecta, Assembled from Single-**



- 905 **Molecule, Real-Time Sequencing Data.** *Genome Announcements* 2016,  
906 4(5):e00975-00916.
- 907 40. Koren S, Walenz BP, Berlin K, Miller JR, Bergman NH, Phillippy AM: **Canu: scalable**  
908 **and accurate long-read assembly via adaptive k-mer weighting and repeat**  
909 **separation.** *Genome Res* 2017, **27**(5):722-736.
- 910 41. Boetzer M, Henkel CV, Jansen HJ, Butler D, Pirovano W: **Scaffolding pre-**  
911 **assembled contigs using SSPACE.** *Bioinformatics* 2011, **27**(4):578-579.
- 912 42. Kleinboelting N, Huet G, Appelhagen I, Viehoveer P, Li Y, Weisshaar B: **The**  
913 **Structural Features of Thousands of T-DNA Insertion Sites Are Consistent with**  
914 **a Double-Strand Break Repair-Based Insertion Mechanism.** *Molecular Plant*  
915 2015, **8**(11):1651-1664.
- 916 43. Stothard P, Wishart DS: **Circular genome visualization and exploration using**  
917 **CGView.** *Bioinformatics* 2005, **21**(4):537-539.
- 918 44. Untergasser A, Nijveen H, Rao X, Bisseling T, Geurts R, Leunissen JA: **Primer3Plus,**  
919 **an enhanced web interface to Primer3.** *Nucleic Acids Res* 2007, **35**:W71-74.
- 920 45. Rosso MG, Li Y, Strizhov N, Reiss B, Dekker K, Weisshaar B: **An Arabidopsis**  
921 **thaliana T-DNA mutagenised population (GABI-Kat) for flanking sequence tag**  
922 **based reverse genetics.** *Plant Mol Biol* 2003, **53**(1):247-259.
- 923 46. Pucker B, Holtgräwe D, Weisshaar B: **Consideration of non-canonical splice sites**  
924 **improves gene prediction on the Arabidopsis thaliana Niederzenz-1 genome**  
925 **sequence.** *BMC Res Notes* 2017, **10**(1):667.
- 926 47. Arend D, Junker A, Scholz U, Schüler D, Wylie J, Lange M: **PGP repository: a plant**  
927 **phenomics and genomics data publication infrastructure.** *Database* 2016.
- 928 48. Simão FA, Waterhouse RM, Ioannidis P, Kriventseva EV, Zdobnov EM: **BUSCO:**  
929 **assessing genome assembly and annotation completeness with single-copy**  
930 **orthologs.** *Bioinformatics* 2015, **31**(19):3210-3212.
- 931 49. Keller O, Kollmar M, Stanke M, Waack S: **A novel hybrid gene prediction method**  
932 **employing protein multiple sequence alignments.** *Bioinformatics* 2011, **27**(6):757-  
933 763.
- 934 50. Kurtz S, Phillippy A, Delcher AL, Smoot M, Shumway M, Antonescu C, Salzberg SL:  
935 **Versatile and open software for comparing large genomes.** *Genome Biol* 2004,  
936 5(2):R12.
- 937 51. Vukašinović N, Cvrčková F, Eliáš M, Cole R, Fowler JE, Žárský V, Synek L:  
938 **Dissecting a hidden gene duplication: the Arabidopsis thaliana SEC10 locus.**  
939 *PLoS ONE* 2014, **9**(4):e94077.
- 940 52. Reimand J, Arak T, Adler P, Kolberg L, Reisberg S, Peterson H, Vilo J: **g:Profiler-a**  
941 **web server for functional interpretation of gene lists (2016 update).** *Nucleic*  
942 *Acids Res* 2016, **44**((W1)):W83-89.
- 943 53. Cho YS, Kim H, Kim HM, Jho S, Jun J, Lee YJ, Chae KS, Kim CG, Kim S, Eriksson A  
944 *et al*: **An ethnically relevant consensus Korean reference genome is a step**  
945 **towards personal reference genomes.** *Nature Communications* 2016:13637.
- 946 54. Seo JS, Rhie A, Kim J, Lee S, Sohn MH, Kim CU, Hastie A, Cao H, Yun JY, Kim J *et*  
947 *al*: **De novo assembly and phasing of a Korean human genome.** *Nature* 2016,  
948 **538**(7624):243-247.
- 949 55. Chandrasekhara C, Mohannath G, Blevins T, Pontvianne F, Pikaard CS:  
950 **Chromosome-specific NOR inactivation explains selective rRNA gene silencing**  
951 **and dosage control in Arabidopsis.** *Genes Dev* 2016, **30**(2):177-190.
- 952 56. Copenhaver GP, Pikaard CS: **RFLP and physical mapping with an rDNA-specific**  
953 **endonuclease reveals that nucleolus organizer regions of Arabidopsis thaliana**  
954 **adjoin the telomeres on chromosomes 2 and 4.** *Plant J* 1996, **9**(2):259-272.
- 955 57. Hu TT, Pattyn P, Bakker EG, Cao J, Cheng JF, Clark RM, Fahlgren N, Fawcett JA,  
956 Grimwood J, Gundlach H *et al*: **The Arabidopsis lyrata genome sequence and the**  
957 **basis of rapid genome size change.** *Nat Genet* 2011, **43**(5):476-481.
- 958 58. Schmuths H, Meister A, Horres R, Bachmann K: **Genome size variation among**  
959 **accessions of Arabidopsis thaliana.** *Ann Bot (Lond)* 2004, **93**(3):317-321.

- 960 59. Villasante A, Abad JP, Méndez-Lago M: **Centromeres were derived from**  
961 **telomeres during the evolution of the eukaryotic chromosome.** *Proceedings of*  
962 *the National Academy of Sciences of the United States of America* 2007,  
963 **104(25):10542-10547.**
- 964 60. Stupar RM, Lilly JW, Town CD, Cheng Z, Kaul S, Buell CR, Jiang J: **Complex**  
965 **mtDNA constitutes an approximate 620-kb insertion on Arabidopsis thaliana**  
966 **chromosome 2: implication of potential sequencing errors caused by large-unit**  
967 **repeats.** *Proceedings of the National Academy of Sciences of the United States of*  
968 *America* 2001, **98(9):5099-5103.**
- 969 61. Kowalski SP, Lan TH, Feldmann KA, Paterson AH: **Comparative mapping of**  
970 **Arabidopsis thaliana and Brassica oleracea chromosomes reveals islands of**  
971 **conserved organization.** *Genetics* 1994, **138(2):499-510.**
- 972 62. Unseld M, Marienfeld JR, Brandt P, Brennicke A: **The mitochondrial genome of**  
973 **Arabidopsis thaliana contains 57 genes in 366,924 nucleotides.** *Nat Genet* 1997,  
974 **15(1):57-61.**
- 975 63. Martínez-Zapater JM, Gil P, Capel J, Somerville CR: **Mutations at the Arabidopsis**  
976 **CHM locus promote rearrangements of the mitochondrial genome.** *Plant Cell*  
977 1992, **4(8):889-899.**
- 978 64. Christensen AC: **Plant mitochondrial genome evolution can be explained by DNA**  
979 **repair mechanisms.** *Genome Biology and Evolution* 2013, **5(6):1079-1086.**
- 980 65. Preuten T, Cincu E, Fuchs J, Zoschke R, Liere K, Börner T: **Fewer genes than**  
981 **organelles: extremely low and variable gene copy numbers in mitochondria of**  
982 **somatic plant cells.** *Plant J* 2010, **64(6):948-959.**
- 983 66. Woloszynska M, Gola EM, Piechota J: **Changes in accumulation of heteroplasmic**  
984 **mitochondrial DNA and frequency of recombination via short repeats during**  
985 **plant lifetime in Phaseolus vulgaris.** *Acta Biochim Pol* 2012, **59(4):703-709.**
- 986 67. Wendel JF, Jackson SA, Meyers BC, Wing RA: **Evolution of plant genome**  
987 **architecture.** *Genome Biol* 2016, **17(37):s13059-13016-10908-13051.**
- 988 68. Denton JF, Lugo-Martinez J, Tucker AE, Schridder DR, Warren WC, Hahn MW: **Extensive error in the number of genes inferred from draft genome assemblies.** *PLoS Computational Biology* 2014, **10(12):e1003998.**
- 991 69. Paquette SM, Bak S, Feyereisen R: **Intron-exon organization and phylogeny in a**  
992 **large superfamily, the paralogous cytochrome P450 genes of Arabidopsis**  
993 **thaliana.** *DNA Cell Biol* 2000, **19(5):307-317.**
- 994 70. Panchy N, Lehti-Shiu M, Shiu SH: **Evolution of Gene Duplication in Plants.** *Plant*  
995 *Physiol* 2016, **171(4):2294-2316.**
- 996 71. Tan S, Zhong Y, Hou H, Yang S, Tian D: **Variation of presence/absence genes**  
997 **among Arabidopsis populations.** *BMC Evolutionary Biology* 2012, **12(86):1471-**  
998 **2148/1412/1486.**
- 999 72. Benovoy D, Drouin G: **Processed pseudogenes, processed genes, and**  
1000 **spontaneous mutations in the Arabidopsis genome.** *J Mol Evol* 2006, **62(5):511-**  
1001 **522.**
- 1002 73. Zou C, Lehti-Shiu MD, Thibaud-Nissen F, Prakash T, Buell CR, Shiu SH: **Evolutionary and expression signatures of pseudogenes in Arabidopsis and rice.** *Plant Physiol* 2009, **151(1):3-15.**
- 1005 74. Yamada K, Lim J, Dale JM, Chen H, Shinn P, Palm CJ, Southwick AM, Wu HC, Kim C, Nguyen M *et al*: **Empirical analysis of transcriptional activity in the Arabidopsis genome.** *Science* 2003, **302(5646):842-846.**
- 1008 75. Siena LA, Ortiz JP, Calderini O, Paolucci F, Cáceres ME, Kaushal P, Grisan S, Pessino SC, Pupilli F: **An apomixis-linked ORC3-like pseudogene is associated with silencing of its functional homolog in apomictic Paspalum simplex.** *J Exp Bot* 2016, **67(6):1965-1978.**
- 1012 76. Zmienko A, Samelak-Czajka A, Kozłowski P, Szymanska M, Figlerowicz M: **Arabidopsis thaliana population analysis reveals high plasticity of the genomic region spanning MSH2, AT3G18530 and AT3G18535 genes and provides**  
1013  
1014

- 1015 **evidence for NAHR-driven recurrent CNV events occurring in this location.** *BMC*  
1016 *Genetics* 2016, **17**(1):893.
- 1017 77. Yang L, Takuno S, Waters ER, Gaut BS: **Lowly expressed genes in Arabidopsis**  
1018 **thaliana bear the signature of possible pseudogenization by promoter**  
1019 **degradation.** *Mol Biol Evol* 2011, **28**(3):1193-1203.
- 1020 78. Marroni F, Pinosio S, Morgante M: **Structural variation and genome complexity: is**  
1021 **dispensable really dispensable?** *Curr Opin Plant Biol* 2014, **18**:31-36.
- 1022 79. Golicz AA, Batley J, Edwards D: **Towards plant pangenomics.** *Plant Biotechnol J*  
1023 2016, **14**(4):1099-1105.
- 1024 80. Murat F, Van de Peer Y, Salse J: **Decoding plant and animal genome plasticity**  
1025 **from differential paleo-evolutionary patterns and processes.** *Genome Biology*  
1026 *and Evolution* 2012, **4**(9):917-928.
- 1027 81. Blanc G, Wolfe KH: **Widespread paleopolyploidy in model plant species inferred**  
1028 **from age distributions of duplicate genes.** *Plant Cell* 2004, **16**(7):1667-1678.
- 1029 82. Vision TJ, Brown DG, Tanksley SD: **The origins of genomic duplications in**  
1030 **Arabidopsis.** *Science* 2000, **290**(5499):2114-2117.
- 1031 83. Renny-Byfield S, Gallagher JP, Grover CE, Szadkowski E, Page JT, Udall JA, Wang  
1032 X, Paterson AH, Wendel JF: **Ancient gene duplicates in Gossypium (cotton)**  
1033 **exhibit near-complete expression divergence.** *Genome Biology and Evolution*  
1034 2014, **6**(3):559-571.
- 1035 84. Bennetzen JL: **Transposable elements, gene creation and genome**  
1036 **rearrangement in flowering plants.** *Current Opinion in Genetics & Development*  
1037 2005, **15**(6):621-627.
- 1038 85. Sun W, Zhao XW, Zhang Z: **Identification and evolution of the orphan genes in**  
1039 **the domestic silkworm, Bombyx mori.** *FEBS Lett* 2015, **589**:2731-2738.
- 1040 86. Tautz D, Domazet-Lošo T: **The evolutionary origin of orphan genes.** *Nat Rev*  
1041 *Genet* 2011, **12**(10):692-702.
- 1042 87. Schmitz JF, Bornberg-Bauer E: **Fact or fiction: updates on how protein-coding**  
1043 **genes might emerge de novo from previously non-coding DNA.** *F1000Research*  
1044 2017, **6**(57).
- 1045 88. Fischer D, Eisenberg D: **Finding families for genomic ORFans.** *Bioinformatics*  
1046 1999, **15**(9):759-762.
- 1047 89. Khalturin K, Hemmrich G, Fraune S, Augustin R, Bosch TC: **More than just**  
1048 **orphans: are taxonomically-restricted genes important in evolution?** *Trends*  
1049 *Genet* 2009, **25**(9):404-413.
- 1050 90. Klasberg S, Bitard-Feildel T, Mallet L: **Computational Identification of Novel**  
1051 **Genes: Current and Future Perspectives.** *Bioinformatics and Biology Insights*  
1052 2016, **10**:121-131.
- 1053 91. Xu Y, Wu G, Hao B, Chen L, Deng X, Xu Q: **Identification, characterization and**  
1054 **expression analysis of lineage-specific genes within sweet orange (Citrus**  
1055 **sinensis).** *BMC Genomics* 2015, **16**(995):s12864-12015-12211-z.
- 1056
- 1057

1058 **Figure Legends**

1059

1060 **Figure 1: Nd-1 genome structure.**

1061 Schematic pseudochromosomes are shown in black with centromere repeat positions in  
1062 green. Red dots indicate positions of 45S rDNA fragments and an orange star represents a  
1063 complete 45S rDNA transcription unit. Blue triangles indicate the positions of 5S rDNAs. The  
1064 position of telomeric repeats is shown by purple triangles.

1065

1066

1067 **Figure 2: Inversion on chromosome 4.**

1068 The dotplot heatmaps show the similarity between small fragments of two sequences. Each  
1069 dot indicates a match of 1 kbp between both sequences, while the color is indicating the  
1070 similarity of the matching sequences. (a) Comparison of the Nd-1 genome sequence against  
1071 the Col-0 reference sequence reveals a 1 Mbp inversion. (b) The Ler genome sequence  
1072 displays another inversion allele [23].

1073

1074

1075 **Figure 3: Highly divergent region on chromosome 2.**

1076 There is a very low similarity (light blue) between the sequences in region A and almost no  
1077 similarity between the sequences in region B (white). The complete region between  
1078 3.29 Mbp and 3.48 Mbp on NdChr2 is missing in the Ler genome assembly.

1079

1080

1081 **Figure 4: Hidden locus in the Col-0 reference sequence.**

1082 Differences between the Nd-1 and Col-0 genome sequences lead to the discovery of a  
1083 collapsed region in the Col-0 reference sequence. There are two copies of At2g22214 (blue)  
1084 present in the Col-0 genome, while only one copy is represented in the reference genome  
1085 sequence. This gene duplication was initially validated through PCR with outwards facing

1086 oligonucleotides N258 and N259 (purple) which lead to the formation of the expected PCR  
1087 product (black). Parts of this region were cloned into plasmids (grey) for sequencing. Sanger  
1088 and paired-end Illumina sequencing reads revealed one complete gene (At4g22214b) and a  
1089 degenerated copy (At4g22214a). Moreover, the region downstream of the complete gene  
1090 copy in Nd-1 indicates the presence of at least one additional degenerated copy.

1091

1092

1093

1094 **Table 1: Nd-1 *de novo* assembly statistics.**

1095 Metrics of the FALCON assembly of the Nd-1 nucleome sequence.

| parameter             | Nd-1 nucleome |
|-----------------------|---------------|
| number of contigs     | 26            |
| total number of bases | 119,540,544   |
| average contig length | 4,597,713 bp  |
| minimal contig length | 86,055 bp     |
| maximal contig length | 15,877,978 bp |
| GC content            | 36.04%        |
| N25                   | 14,534,675 bp |
| N50                   | 9,302,209 bp  |
| N75                   | 6,666,836 bp  |
| N90                   | 2,829,734 bp  |

1096

1097

1098

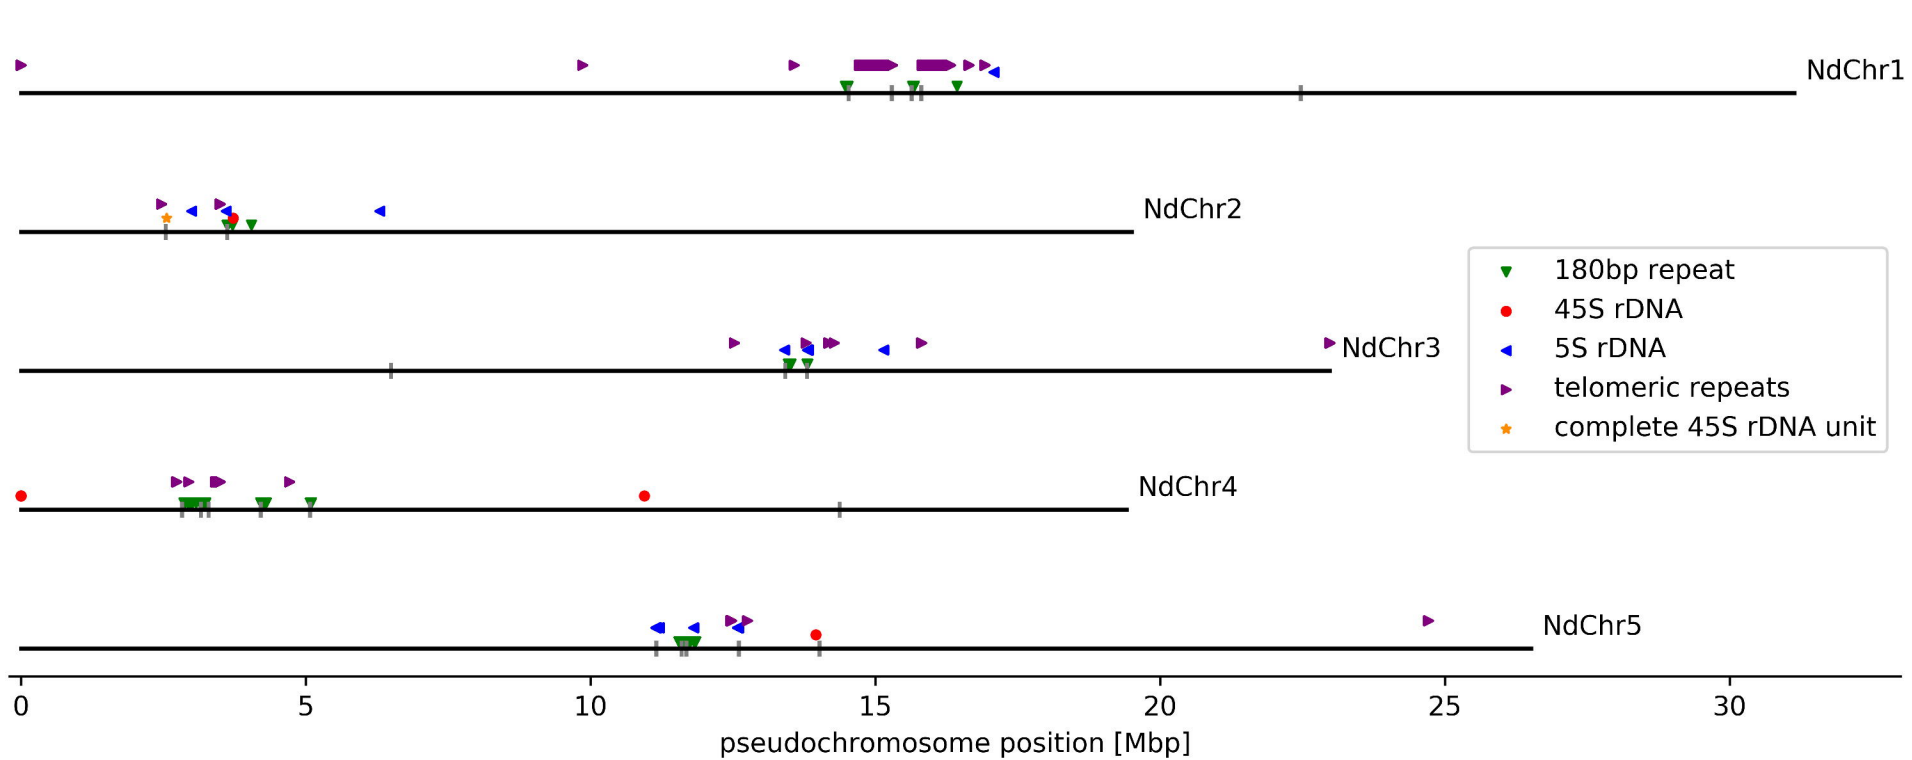

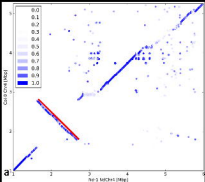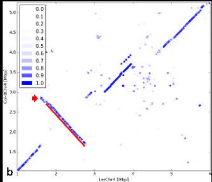



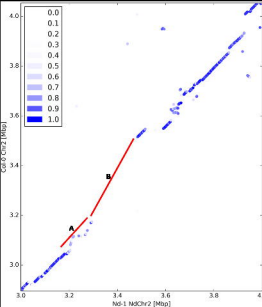

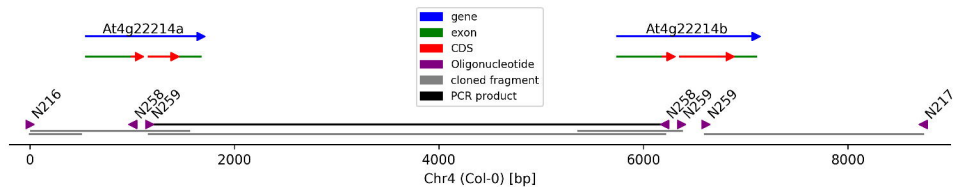

Source: https://www.biorxiv.org/content/10.1101/407627v1.full.pdf
